# Supplementary figures and images for: Mitogenomic Codon Usage Patterns of Superfamily Certhioidea (Aves, Passeriformes): Insights into Asymmetrical Bias and Phylogenetic Implications
Source: MDPI journal article supplement (doi:10.3390/ani13010096), 2022-12-27

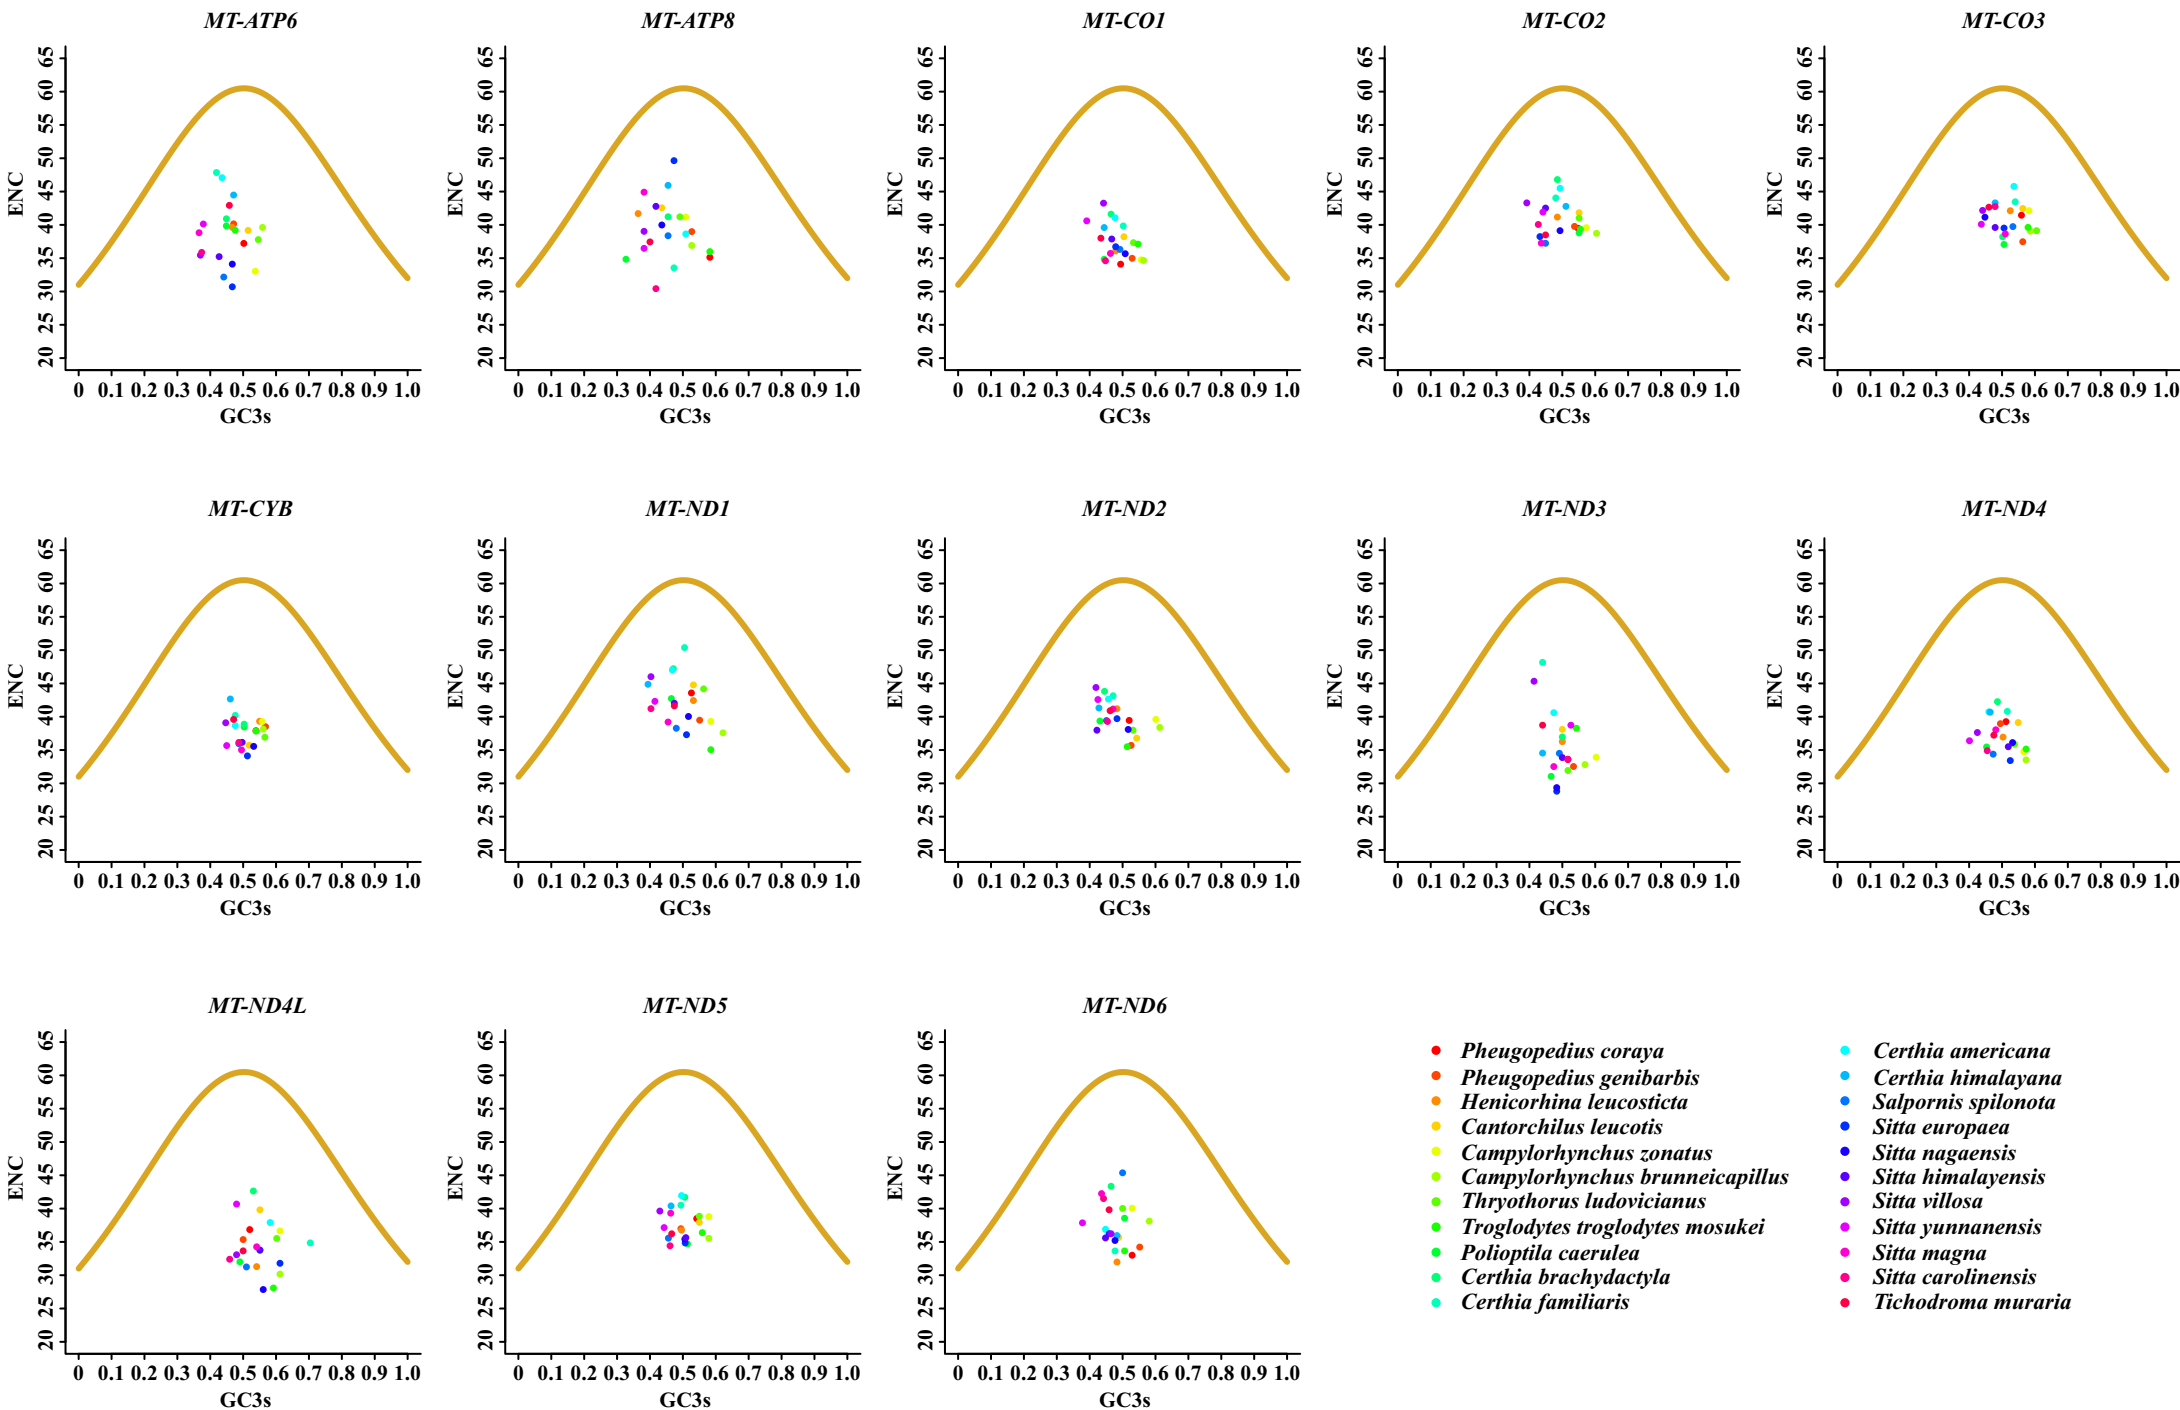

Supplement: s1 [file s1]
